# Supplementary material
Source: PubMed Central journal article supplement (PMC1780004)
Supplement: tjp0572-0677-supplemental-figure-1.pdf [file tjp0572-0677-supplemental-figure-1.pdf]

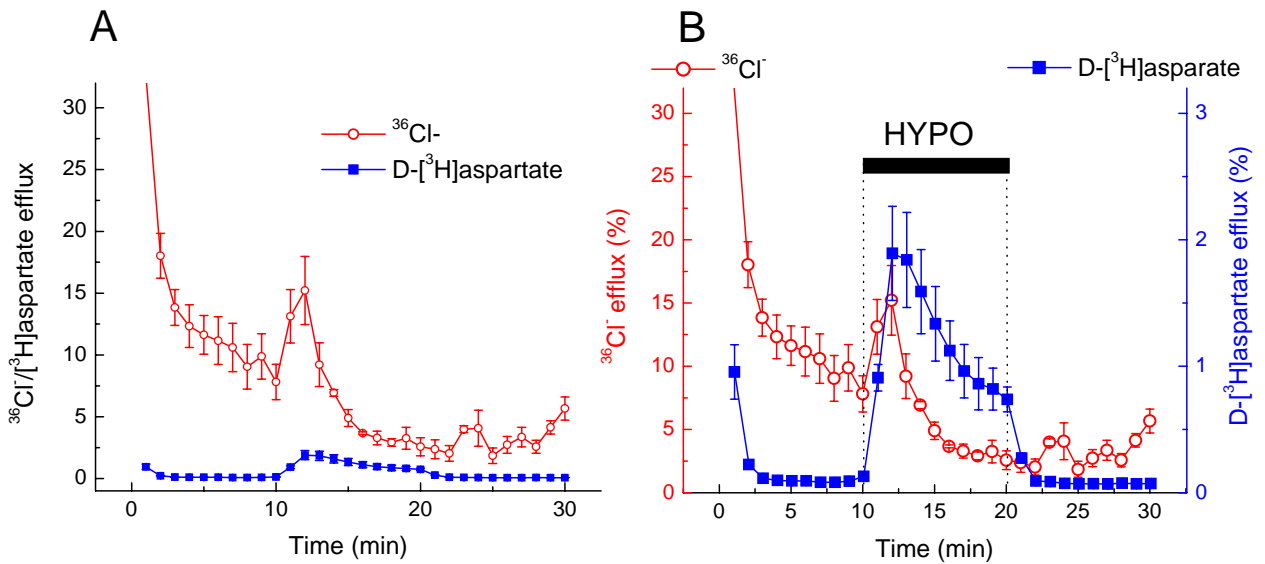

**Supplemental Figure 1. Simultaneous measurements of D- $[^3\text{H}]\text{aspartate}$  and  $^{36}\text{Cl}^-$  release from cultured astrocytes exposed to hypoosmotic medium.**

Cells were preloaded overnight with 4  $\mu\text{Ci/ml}$  D- $[^3\text{H}]\text{aspartate}$ , washed from extracellular isotope, and then additionally loaded for 2 hrs with 35  $\mu\text{Ci/ml}$   $^{36}\text{Cl}^-$ . After wash of extracellular  $^{36}\text{Cl}^-$ , cells were placed in a Lucite perfusion chamber and perfused with isoosmotic and hypoosmotic media, as indicated. D- $[^3\text{H}]\text{aspartate}$  and  $^{36}\text{Cl}^-$  in collected perfusate fractions were counted separately (0-16 keV window for  $[^3\text{H}]$  and 16-700 keV for  $^{36}\text{Cl}^-$ ; these settings allow for negligible  $[^{36}\text{Cl}^-]$  contribution to  $[^3\text{H}]$  counts and no  $[^3\text{H}]$  contribution to  $[^{36}\text{Cl}^-]$  counts). Because of the high rate of anion exchange in cultured astrocytes,  $^{36}\text{Cl}^-$  was strongly depleted in the cells by the first 2-3 minutes of hypoosmotic exposure. Therefore the present data should be considered only qualitatively and mindful of the continuously decreasing  $^{36}\text{Cl}^-$  availability. **A**, D- $[^3\text{H}]\text{aspartate}$  and  $^{36}\text{Cl}^-$  releases are presented on the same scale. **B**, The same data are presented on different scales for easier comparison of efflux kinetics for both isotopes. Data are means  $\pm$ SE of 3 experiments.
